# Supplementary material for: Compressed porous graphene particles for use as supercapacitor electrodes with excellent volumetric performance
Source: Royal Society of Chemistry journal article supplement (doi:10.1039/c5nr06113j), 2015-01-01
Supplement: c5nr06113j1.pdf [file c5nr06113j1.pdf]

## Electronic Supplementary Information (ESI)

### Compressed porous graphene particles for use as supercapacitor electrodes with excellent volumetric performance

Huan Li<sup>a,b, ‡</sup>, Ying Tao<sup>a,b, ‡</sup>, Xiaoyu Zheng<sup>a,b, ‡</sup>, Zhengjie Li<sup>a,b</sup>, Donghai Liu<sup>a,b</sup>, Zhao Xu<sup>a,b</sup>, Chong Luo<sup>c</sup>, Jiayan Luo<sup>a,b,\*</sup>, Feiyu Kang<sup>c</sup>, Quan-Hong Yang<sup>a,b,c,\*</sup>

<sup>a</sup>Key Laboratory for Green Chemical Technology of Ministry of Education, School of Chemical Engineering and Technology, Tianjin University, Tianjin 300072, China

<sup>b</sup>Collaborative Innovation Center of Chemical Science and Engineering (Tianjin), Tianjin 300072, China

<sup>c</sup>Shenzhen Key Laboratory for Graphene-based Materials and Engineering Laboratory for Functionalized Carbon Materials, Graduate School at Shenzhen, Tsinghua University, Shenzhen 518055, China

E-mail: [qhyangcn@tju.edu.cn](mailto:qhyangcn@tju.edu.cn); [jluo@tju.edu.cn](mailto:jluo@tju.edu.cn).

## Experimental Section

### Synthesis of porous graphene particles (PGPs)

Graphite oxide colloidal suspension (2 mg mL<sup>-1</sup>) was prepared by ultrasonication of graphite oxide powders (170 mg) made of modified Hummers' method in 85 mL de-ionized water, followed by centrifugation (3800 rpm for 20 min). Typically, the homogeneous GO colloid suspension was placed in a Teflon-lined autoclave, and treated by a hydrothermal process in muffle furnace (180 °C) for 6 h, resulting in a cylindrical graphene hydrogel. Such hydrogel was soaked in 20 mL KOH solution for 12 h static adsorption and subsequent vacuum drying. Then the mixture was subjected to heat treatment at 800 °C for 1 h in argon flowing condition. After cooling down to room temperature, the sample was repeatedly washed by 5 % HCl and de-ionized water, followed by drying overnight to afford the products (PGPs).

### Materials characterization

The morphology of samples were captured by scanning electron microscopy (SEM) (Hitachi S4800, Japan) with accelerating voltage of 5.0 kV. Transmission electron microscopy (TEM) characterization was performed on JEM 3100F (JEOL, Japan) operated at 200 kV. X-ray diffraction (XRD) patterns were recorded on a Bruker D-8 (Cu K $\alpha$  radiation,  $\lambda=1.54056$  Å) at room temperature and the data was collected from 10° to 60° with a scan rate of 10 ° min<sup>-1</sup>. TGA was performed on a TG8120 by heating the samples to 800 °C at 10 °C min<sup>-1</sup> in the atmosphere of nitrogen. Raman spectroscopy was recorded by a multi-

wavelength micro-Raman spectroscope (JY HR800) using 532.05 nm incident radiation and a 50× aperture. N<sub>2</sub> adsorption-desorption isotherms (77 K) were measured by Belsorp-Mini instrument (BEL, Inc, Japan). Samples of approximately 50 mg were heated at 200 °C under vacuum to remove all the adsorbed species. Specific surface area and pore size distribution were performed by Brunauer-Emmett-Teller (BET) and Density Function Theories (DFT) method, respectively.

### Electrochemical measurements

Symmetrical two-electrode cell configuration was used to measure the performance of PGPs as supercapacitor electrode. PGPs were mixed with polytetrafluoroethylene (binder) with a mass ratio of 97:3 without conductive additives. The mixture was ground up with mortar and pestle, rolled into 120 μm thick raw films and punched into 1 cm diameter electrode. Then raw films were compressed by 10 MPa (91 μm thick), 25 MPa (67 μm thick) and 40 MPa (55 μm thick). And the corresponding electrode density was 0.55 g cm<sup>-3</sup> (PGPs-10 MPa), 0.75 g cm<sup>-3</sup> (PGPs-25 MPa) and 0.92 g cm<sup>-3</sup> (PGPs-40 MPa) while density of uncompressed electrode was 0.42 g cm<sup>-3</sup> (PGPs-0 MPa). Two nearly identical electrodes were assembled in a test cell consisting of two electrodes, two current collectors and an ion separator supported by two stainless steel plates. The assembly of test cell in ionic liquid (BMIMBF<sub>4</sub>) was carried out in a glove box filled with Ar. Electrochemical impedance spectroscopy, cyclic voltammetry and galvanostatic charge-discharge test were performed on electrochemical workstation (Metrohm, Switzerland) and LAND (Wuhan, China).

The specific capacitance based on single electrode of the device was calculated from the galvanostatic charge-discharge curves at different current densities using the formula:

$$C_s \text{ (F g}^{-1}\text{)} = 2I\Delta t/m\Delta U \quad (1)$$

Where I is the constant current applied, Δt is the discharge time, ΔU is the operating voltage and m is the net mass of the active material on single electrode.

The volumetric capacitance was calculated as:

$$C_v \text{ (F cm}^{-3}\text{)} = \rho \times C_s \quad (2)$$

Where ρ is the electrode density and C<sub>s</sub> is the specific capacitance of the single electrode.

The volumetric energy density of two electrodes was calculated as:

$$E_{vol} \text{ (Wh L}^{-1}\text{)} = 0.125C_v\Delta U^2/3.6 \quad (3)$$

Where C<sub>v</sub> is the volumetric capacitance of electrode and ΔU is the operating voltage.

The volumetric power density was calculated as:

$$P_{vol} \text{ (W L}^{-1}\text{)} = E_{vol}/\Delta t \quad (4)$$

Where E<sub>vol</sub> is the volumetric energy density and Δt is the discharge time.

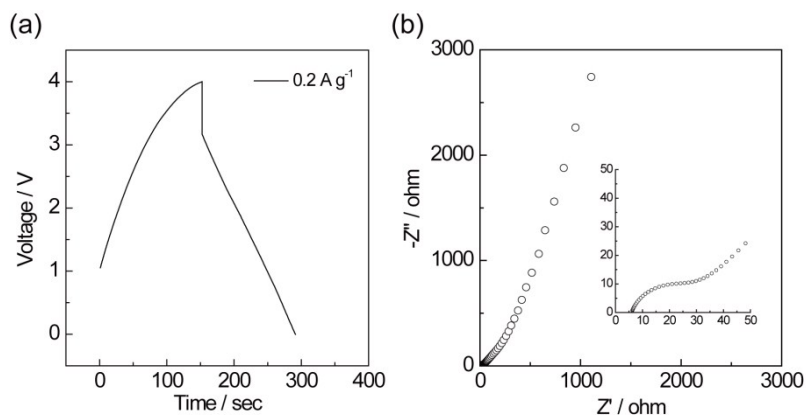

**Fig. S1** Electrochemical performance of HPGM in BMIMBF<sub>4</sub> electrolyte. (a) Charge-discharge curves at 0.2 A g<sup>-1</sup>. (b) Nyquist plot and the inset shows the high-frequency region. HPGM electrode only shows a C<sub>v</sub> of 22 F cm<sup>-3</sup> at 0.2 A g<sup>-1</sup> and Nyquist plot in low-frequency region shows a limited capacitive properties.

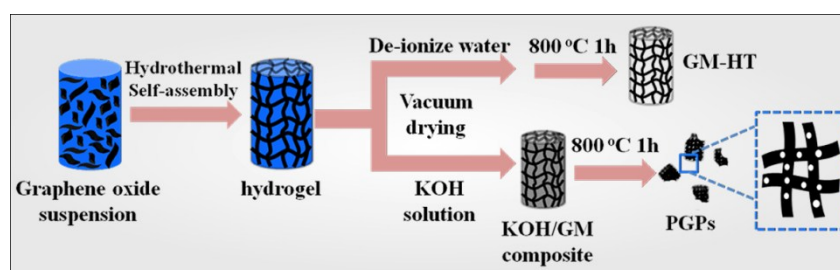

**Fig. S2** Scheme of preparation routes for preparing of PGPs

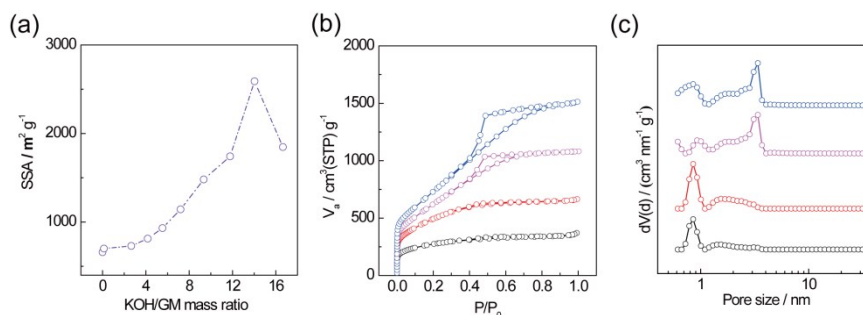

**Fig. S3** (a) BET specific surface area (SSA) of PGPs varied from KOH/GM mass ratio and (b) N<sub>2</sub> adsorption-desorption isotherms (77 K) and (c) pore size distribution calculated by DFT model of typical activated samples. The activated products can reach 945 m<sup>2</sup> g<sup>-1</sup>, 1742 m<sup>2</sup> g<sup>-1</sup>, 2590 m<sup>2</sup> g<sup>-1</sup> and 2126 m<sup>2</sup> g<sup>-1</sup> corresponding to the KOH/GM mass ratio of 5.5, 11.7, 14.0 and 16.6. Pore size distribution reveals that there is an obviously increase of ultramicropores less than 1 nm and mesopores around 3.5 nm.

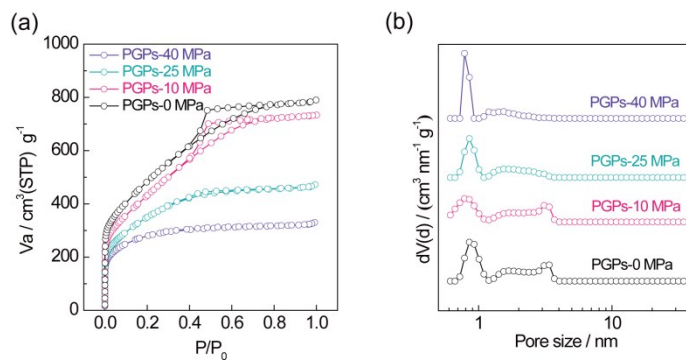

**Fig. S4**  $N_2$  adsorption-desorption isotherms (77 K) and pore size distribution of PGPs-40 MPa, PGPs-25 MPa, PGPs-10 MPa and PGPs-0 MPa electrode. The BET specific surface area of electrodes are  $968 \text{ m}^2 \text{ g}^{-1}$ ,  $1232 \text{ m}^2 \text{ g}^{-1}$ ,  $1534 \text{ m}^2 \text{ g}^{-1}$ ,  $1700 \text{ m}^2 \text{ g}^{-1}$  with electrode density of  $0.92 \text{ g cm}^{-3}$ ,  $0.75 \text{ g cm}^{-3}$ ,  $0.55 \text{ g cm}^{-3}$ ,  $0.42 \text{ g cm}^{-3}$ . PGPs-40 MPa electrode shows a micropore size mainly at  $0.75 \sim 0.8 \text{ nm}$  and mesopores about  $2 \sim 3 \text{ nm}$ .

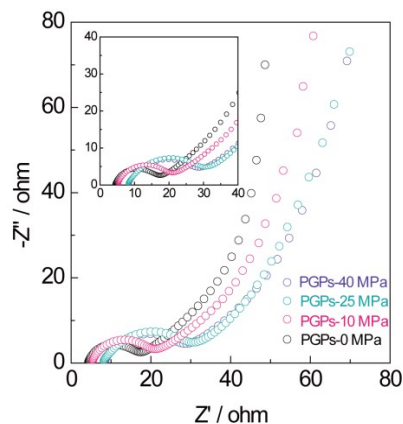

**Fig. S5** Nyquist plots of PGPs based supercapacitors. Small resistance reveals excellent capacitive properties of such electrodes.

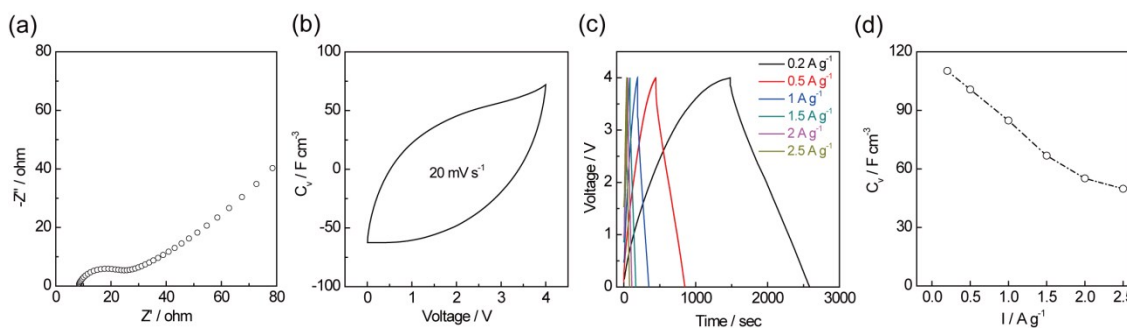

**Fig. S6** Electrochemical performance of GM-HT in two-electrode  $\text{BMIMBF}_4$  electrolyte system. By comparison, PGPs-40 MPa electrode shows high volumetric capacitance with superior rate performance.

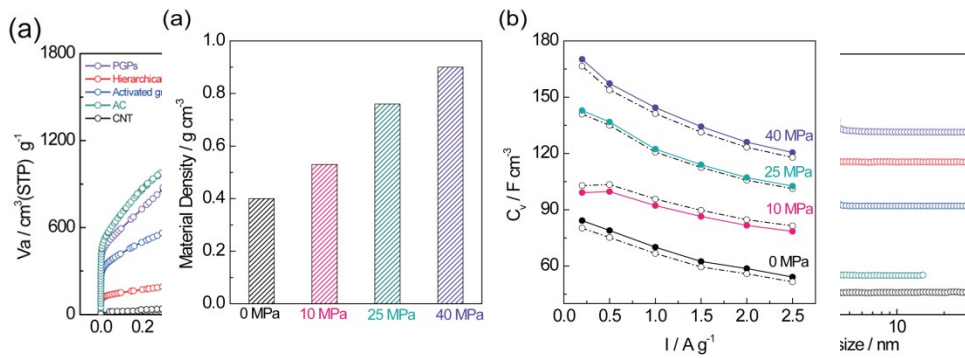

**Fig. S7** (a) Compressed material density at different compression pressure; (b) Comparison of volumetric capacitance calculated based on electrode density (solid line) compressed material density (dash line). SSA of them are 2590  $\text{m}^2 \text{g}^{-1}$ , 632  $\text{m}^2 \text{g}^{-1}$ , 1758  $\text{m}^2 \text{g}^{-1}$ , 3196  $\text{m}^2 \text{g}^{-1}$ , 100  $\text{m}^2 \text{g}^{-1}$ , respectively. PGPs show large amounts of micropores and mesopores

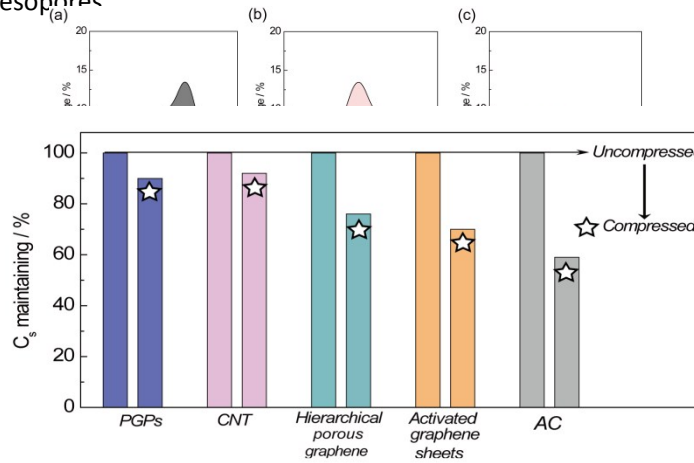

**Fig. S8** (a-c) PGPs

**Fig. S10** (a) Graphitic particle capacitance and (b) Schematic for the compressed low density and high density electrode, activated graphene sheets and commercial active carbon (AC).

**Table S1** Compression investigations for PGPs, hierarchical porous graphene, activated graphene sheets, commercial AC and CNT electrodes. The capacitance was obtained by charge-discharge curves at 1 A g<sup>-1</sup>.

|                                                   | PGPs  | Hierarchical<br>graphene | Activated<br>graphene sheet | AC    | CNT  |
|---------------------------------------------------|-------|--------------------------|-----------------------------|-------|------|
| SSA / m <sup>2</sup> g <sup>-1</sup><br>(Powders) | 2590  | 632                      | 1758                        | 3196  | 100  |
| SSA / m <sup>2</sup> g <sup>-1</sup><br>(10 MPa)  | 1534  | 434                      | 892                         | 1843  | 102  |
| Electrode density /<br>g cm <sup>-3</sup>         | 0.55  | 0.31                     | 0.56                        | 0.51  | 0.27 |
| C <sub>s</sub> / F g <sup>-1</sup>                | 174   | 82                       | 130                         | 172   | 20   |
| C <sub>v</sub> / F cm <sup>-3</sup>               | 95.7  | 25.42                    | 72.8                        | 87.72 | 5.4  |
| SSA / m <sup>2</sup> g <sup>-1</sup><br>(40 MPa)  | 968   | 323                      | 615                         | 1102  | 86   |
| Electrode density /<br>g cm <sup>-3</sup>         | 0.92  | 0.56                     | 0.84                        | 0.89  | 0.34 |
| C <sub>s</sub> / F g <sup>-1</sup>                | 157   | 62                       | 91                          | 101   | 17   |
| C <sub>v</sub> / F cm <sup>-3</sup>               | 144.4 | 34.72                    | 76.44                       | 89.89 | 5.78 |

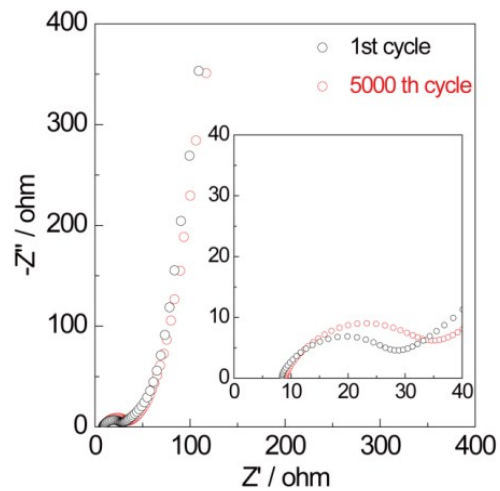

**Fig. S11** Nyquist plots of PGPs-40 MPa based supercapacitor at the first cycle and the 5000<sup>th</sup> cycle after charge-discharge.

**Table S2** Performance of reported electrode materials for symmetric supercapacitors

| Materials reported                   | Material density [g cm <sup>-3</sup> ] | Electrolyte Operating voltage [V]     | C <sub>s</sub> [F g <sup>-1</sup> ] | C <sub>v</sub> [F cm <sup>-3</sup> ] | P <sub>vol</sub> [W L <sup>-1</sup> ] | E <sub>vol</sub> [Wh L <sup>-1</sup> ] | Ref.      |
|--------------------------------------|----------------------------------------|---------------------------------------|-------------------------------------|--------------------------------------|---------------------------------------|----------------------------------------|-----------|
| PGPs                                 | 0.92                                   | BMIMBF <sub>4</sub><br>4 V            | 185.0                               | 170.2                                | 184                                   | 94.6                                   | This work |
| EM-CCG                               | 1.25                                   | EMIMBF <sub>4</sub> /AN<br>3.5 V      | 167.1                               | 208.9                                | ~1353                                 | ~110                                   | 1         |
| 1T MoS <sub>2</sub>                  | 2.5                                    | EMIMBF <sub>4</sub> /MECN<br>3.5 V    | ~100                                | 250                                  | 1100                                  | 110                                    | 2         |
| HGF                                  | 0.71                                   | EMIMBF <sub>4</sub> /AN<br>3.5 V      | 298                                 | 212                                  | 545.4                                 | 79                                     | 3         |
| r[GO-CNT]                            | 1.5                                    | TEABF <sub>4</sub> /PC<br>3 V         | 109.7                               | 165                                  | 600                                   | 51.4                                   | 4         |
| Compressed a-MEGO                    | 0.75                                   | TEABF <sub>4</sub> /AN<br>3.5 V       | 147                                 | 110                                  | 671.7                                 | 48                                     | 5         |
| Ti <sub>3</sub> C <sub>2</sub> Clay  | 3.7                                    | H <sub>2</sub> SO <sub>4</sub><br>1 V | 245                                 | 900                                  | 247.4                                 | 37.8                                   | 6         |
| HPGM                                 | 1.58                                   | TEABF <sub>4</sub> /AN<br>2.5 V       | 110                                 | 174                                  | 196.9                                 | 37.6                                   | 7         |
| Curved graphene                      | 0.3                                    | EMIMBF <sub>4</sub><br>4 V            | 154                                 | 46.2                                 | 300.4                                 | 25.7                                   | 8         |
| a-MEGO                               | 0.36                                   | BMIMBF <sub>4</sub> /AN<br>3.5 V      | 165                                 | 59.4                                 | 315.4                                 | 25.3                                   | 9         |
| Ti <sub>3</sub> C <sub>2</sub> Paper | 4.9                                    | KOH<br>1.1 V                          | ~70                                 | 340                                  | 934.7                                 | 14.28                                  | 10        |

## Notes and references

1. X. Yang, C. Cheng, Y. Wang, L. Qiu and D. Li, *Science*, 2013, **341**, 534-537.
2. M. Acerce, D. Voiry and M. Chhowalla, *Nature Nanotechnology*, 2015, **10**, 313-318.
3. Y. Xu, Z. Lin, X. Zhong, X. Huang, N. O. Weiss, Y. Huang and X. Duan, *Nature Communications*, 2014, **5**, 4554.
4. N. Jung; S. Kwon; D. Lee; D. M. Yoon; Y. M. Park; A. Benayad; J. Y. Choi; J. S. Park, *Advanced Materials* **2013**, **25**, 6854-6858.
5. S. Murali, N. Quarles, L. L. Zhang, J. R. Potts, Z. Tan, Y. Lu, Y. Zhu and R. S. Ruoff, *Nano Energy*, 2013, **2**, 764-768.
6. M. Ghidui, M. R. Lukatskaya, M. Q. Zhao, Y. Gogotsi and M. W. Barsoum, *Nature*, 2014, **516**, 78-81.
7. Y. Tao, X. Xie, W. Lv, D. M. Tang, D. Kong, Z. Huang, H. Nishihara, T. Ishii, B. Li, D. Golberg, F. Kang, T. Kyotani and Q. H. Yang, *Scientific Reports*, 2013, **3**, 2975.
8. C. Liu, Z. Yu, D. Neff, A. Zhamu and B. Z. Jang, *Nano letters*, 2010, **10**, 4863-4868.
9. Y. Zhu, S. Murali, M. D. Stoller, K. J. Ganesh, W. Cai, P. J. Ferreira, A. Pirkle, R. M. Wallace, K. A. Cychosz, M. Thommes, D. Su, E. A. Stach and R. S. Ruoff, *Science*, 2011, **332**, 1537-1541.
10. M. R. Lukatskaya, O. Mashtalir, C. E. Ren, Y. Dall'Agnese, P. Rozier, P. L. Taberna, M. Naguib, P. Simon, M. W. Barsoum and Y. Gogotsi, *Science*, 2013, **341**, 1502-1505.
